# Supplementary material
Source: PubMed Central journal article supplement (PMC4512169)
Supplement: NIHMS699815-supplement-1.pdf [file NIHMS699815-supplement-1.pdf]

## Supplemental Digital Content 1. Combination antiretroviral therapy regimens utilized in each study

| Study             | cART regimen(s)                                                                                                                                                                                                  |
|-------------------|------------------------------------------------------------------------------------------------------------------------------------------------------------------------------------------------------------------|
| Almeida 2011      | 56/89 (65%) NVP-based regimen<br>31/89 (35%) EFV-based regimen                                                                                                                                                   |
| Auld 2011         | 88% NVP/EFV + d4T + 3TC<br>11% NVP/EFV + ZDV + 3TC<br><1% d4T/ZDV + 3TC + abacavir<br><1% other                                                                                                                  |
| Bassett 2012      | “standard ART regimens as per contemporaneous South African guidelines”                                                                                                                                          |
| Bastard 2012      | 83.7% NVP + d4T + 3TC<br>11.9% EFV + d4T + 3TC<br>4.4% other                                                                                                                                                     |
| Boulle 2008 (a)   | NVP + 2 NRTIs                                                                                                                                                                                                    |
| Boulle 2008 (b)   | EFV + 2 NRTIs                                                                                                                                                                                                    |
| Boulle 2010       | 8.4% NVP + ZDV + 3TC<br>38.5% NVP + d4T + 3TC<br>8.8% EFV + ZDV + 3TC<br>43.6% EFV + d4T + 3TC<br>0.8% other                                                                                                     |
| Breen 2006        | 8% triple NRTI<br>62% 2 NRTIs + NNRTI<br>10% 2 NRTIs + PI<br>12% 2 NRTIs + boosted PI<br>5% 2 NRTIs + PI + NNRTI<br>4% not recorded                                                                              |
| Dronda 2011       | Not specified                                                                                                                                                                                                    |
| Hardwick 2012     | EFV-based cART                                                                                                                                                                                                   |
| Hermans 2011      | On TB treatment: 309 (54%) NVP + d4T + 3TC, 242 (43%) EFV + ZDV + 3TC, 19 (3%) other<br>Not on TB treatment: 2025 (63%) NVP + d4T + 3TC, 894 (28%) EFV + ZDV + 3TC, 308 (9%) other                               |
| Hung 2003         | Prior to PI introduction: 2 NRTIs<br>After PI introduction: cART “according to CDC guidelines”                                                                                                                   |
| Julg 2012         | 360 (81%) EFV + d4T + 3TC<br>82 (19%) other                                                                                                                                                                      |
| Lartey 2011       | 600 mg EFV + 400/300mg didanosine + 300 mg 3TC once daily                                                                                                                                                        |
| Manosuthi 2006    | NVP + d4T + 3TC<br>d4T switched to tenofovir or ZDV if d4T-related adverse events developed                                                                                                                      |
| Manosuthi 2008    | NVP + d4T + 3TC<br>d4T switched to tenofovir or ZDV if d4T-related adverse events developed                                                                                                                      |
| Manosuthi 2010    | NVP + d4T + 3TC<br>d4T switched to tenofovir or ZDV if d4T-related adverse events developed                                                                                                                      |
| Mugusi 2012       | On TB treatment: 50.7% EFV + d4T + 3TC, 49.3% EFV + ZDV + 3TC<br>Not on TB treatment: 16.9% EFV + d4T + 3TC, 83.1% EFV + ZDV + 3TC                                                                               |
| Mussini 2008      | 66% PI-based cART, 25% NNRTI-based cART, 10% NRTIs or a combination of 3 drug classes<br>85% on 3TC, 57% on ZDV, 37% on d4T, 28% on indinavir, 23% on ritonavir, 20% on EFV, 18% on nelfinavir, 13% on lopinavir |
| Odo 2012          | Not specified                                                                                                                                                                                                    |
| Patel 2004        | 225 (88%) EFV + d4T + 3TC<br>30 (12%) EFV + ZDV + 3TC                                                                                                                                                            |
| Schomaker 2013    | Not specified                                                                                                                                                                                                    |
| Shipton 2009      | On TB treatment: 55 (35%) NVP + 2 NRTIs, 100 (65%) EFV + 2 NRTIs<br>Not on TB treatment: 75 (48%) NVP + 2 NRTIs, 80 (52%) EFV + 2 NRTIs                                                                          |
| Sumantri 2008     | 56.2% NVP + ZDV + 3TC<br>10.8% NVP + d4T + 3TC<br>13.1% EFV + ZDV + 3TC<br>11.5% EFV + d4T + 3TC                                                                                                                 |
| Tan 2010          | Not specified                                                                                                                                                                                                    |
| Wanchu 2010 (a,b) | On TB treatment: EFV-based 3 drug cART<br>Not on TB treatment: NVP-based cART                                                                                                                                    |

Abbreviations: 3TC, lamivudine; ART, antiretroviral therapy; cART, combination antiretroviral therapy; d4T, stavudine; EFV, efavirenz; NNRTI, non-nucleoside reverse-transcriptase inhibitor; NRTI, nucleos(t)ide reverse-transcriptase inhibitor; NVP, nevirapine; PI, protease inhibitor; TB, tuberculosis; ZDV, zidovudine

## Supplemental Digital Content 2. Timing of TB treatment in relation to cART initiation, by study

| Study             | Timing of TB treatment in relation to cART initiation                                                                                                                                                                                        |
|-------------------|----------------------------------------------------------------------------------------------------------------------------------------------------------------------------------------------------------------------------------------------|
| Almeida 2011      | Not specified                                                                                                                                                                                                                                |
| Auld 2011         | Not specified                                                                                                                                                                                                                                |
| Bassett 2012      | 144 newly diagnosed by sputum culture at cART enrollment<br>199 previously diagnosed and on TB treatment at cART enrollment                                                                                                                  |
| Bastard 2012      | Not specified                                                                                                                                                                                                                                |
| Boulle 2008 (a)   | Patients only included in the TB treatment-exposed group in the analysis if they continued TB treatment past 14 days post cART initiation.                                                                                                   |
| Boulle 2008 (b)   | Duration of TB treatment at cART initiation [median (IQR)]: 87 (60-135) days<br>Patients only included in the TB treatment-exposed group in the analysis if they continued TB treatment past 14 days post cART initiation.                   |
| Boulle 2010       | Duration of TB treatment at cART initiation [median (IQR)]: 73 (44-115) days<br>Not specified                                                                                                                                                |
| Breen 2006        | Duration of TB treatment at cART initiation [median (range)]: 2 (0-8) months<br>All patients were still on TB treatment at cART initiation.                                                                                                  |
| Dronda 2011       | Duration of TB treatment at cART initiation [median (IQR)]: 53 (25.75-83.25) days                                                                                                                                                            |
| Hardwick 2012     | cART was initiated on the fourth week of TB treatment.                                                                                                                                                                                       |
| Hermans 2011      | Not specified                                                                                                                                                                                                                                |
| Hung 2003         | Not clear                                                                                                                                                                                                                                    |
| Julg 2012         | Not specified                                                                                                                                                                                                                                |
| Lartey 2011       | Duration of TB treatment at cART initiation ranged from 4 to 90 days (median: 33)                                                                                                                                                            |
| Manosuthi 2006    | On rifampin-containing TB treatment for $\geq 1$ month prior to study enrollment                                                                                                                                                             |
| Manosuthi 2008    | Median (IQR) duration of concurrent administration of nevirapine and rifampin: 5.4 (4.6-6.1) months                                                                                                                                          |
| Manosuthi 2010    | Median (IQR) duration of concurrent administration of nevirapine and rifampin: 5.4 (4.6-6.1) months                                                                                                                                          |
| Mugusi 2012       | All patients diagnosed with TB started cART after 4 weeks of TB treatment.                                                                                                                                                                   |
| Mussini 2008      | TB was part of an AIDS diagnosis at the time of HIV diagnosis.<br>cART was started a median of 31 (95% CI 30-34) days after HIV diagnosis.                                                                                                   |
| Odo 2012          | Not clear                                                                                                                                                                                                                                    |
| Patel 2004        | TB treatment started at the same time as cART and continued for 9 months.                                                                                                                                                                    |
| Schomaker 2013    | Not specified                                                                                                                                                                                                                                |
| Shipton 2009      | Duration of TB treatment at cART initiation [median]: 81 days<br>21% had <2 months of overlapping TB treatment and cART<br>33% had 2-4 months of overlapping TB treatment and cART<br>46% had >4 months of overlapping TB treatment and cART |
| Sumantri 2008     | All patients simultaneously diagnosed with TB and HIV started cART after 2 weeks of TB treatment.                                                                                                                                            |
| Tan 2010          | Not specified                                                                                                                                                                                                                                |
| Wanchu 2010 (a,b) | All patients diagnosed with TB started cART after 1 month of TB treatment.                                                                                                                                                                   |

Abbreviations: cART, combination antiretroviral therapy; IQR, interquartile range; TB, tuberculosis

### Supplemental Digital Content 3. Methods for handling loss-to-follow-up and mortality utilized by each study

| Study             | Methods to handle loss-to-follow-up and mortality                                                                                                                                                                                                                                                                                                                                                                                                                    |
|-------------------|----------------------------------------------------------------------------------------------------------------------------------------------------------------------------------------------------------------------------------------------------------------------------------------------------------------------------------------------------------------------------------------------------------------------------------------------------------------------|
| Almeida 2011      | The analysis was limited to a subset of patients with complete baseline, 4-month, and 10-month HIV RNA and CD4 count measures (n=89). Patients who died or were LTFU were excluded. Additionally, patients who did not suppress HIV RNA at either 4 or 10 months (n=9) were excluded from the odds ratio comparing early vs. late virologic controllers.                                                                                                             |
| Auld 2011         | Patients who transferred to other facilities were censored from time-to-event analyses at the date of transfer. Multiple imputation was used for missing outcome and covariate data in the immunologic treatment failure model.                                                                                                                                                                                                                                      |
| Bassett 2012      | Patients who missed appointments for >3 months and did not return to the clinic after multiple phone attempts were considered LTFU and were censored at the date of last clinic visit. Only patients alive and in care at 12 months were included in HIV RNA and CD4 count analyses. To assess 12-month virologic suppression, if a patient was alive and in care but did not have a 12-month value, they used the 6-month HIV RNA to approximate the 12-month data. |
| Bastard 2012      | The analysis was limited to patients receiving cART for $\geq 6$ months. Methods for handling LTFU and mortality were not described.                                                                                                                                                                                                                                                                                                                                 |
| Boulle 2008 (a,b) | Patients were classified as LTFU after 6 months without a visit. Patients were excluded from later analyses if they died, transferred out, were LTFU, stopped or changed drugs, or had insufficient follow-up data. Additional censoring at each duration of follow-up was due to the patients not being in care for long enough at the close of the study.                                                                                                          |
| Boulle 2010       | No assumption was made on laboratory outcomes in those who missed a scheduled test or who were LTFU. Only those with available test results were included in analyses. Patients who were LTFU were censored at last visit date. Patients who transferred to other services were censored at date of transfer.                                                                                                                                                        |
| Breen 2006        | It does not appear that any of the 82 patients on TB treatment or the 82 controls died or were LTFU by 6 months.                                                                                                                                                                                                                                                                                                                                                     |
| Dronda 2011       | Patients who were LTFU were censored at last clinic visit date. Those who died during follow-up or did not have an available laboratory test at the time of evaluation were included in the analysis, but were considered as non-responders. Sensitivity analyses excluded those who lacked a laboratory test and/or died prior to evaluation date, and results did not differ from primary analyses.                                                                |
| Hardwick 2012     | Methods for handling LTFU and mortality were not described.                                                                                                                                                                                                                                                                                                                                                                                                          |
| Hermans 2011      | Analysis was limited to patients with $\geq 96$ weeks of follow-up after cART initiation.                                                                                                                                                                                                                                                                                                                                                                            |
| Hung 2003         | Patients were censored at death or LTFU. The authors also performed an “on-treatment” sensitivity analysis, limited to those who continued cART.                                                                                                                                                                                                                                                                                                                     |
| Julg 2012         | Patients were censored if they became LTFU, died, had no HIV RNA testing for >1 year, or switched cART regimen with detectable HIV RNA levels.                                                                                                                                                                                                                                                                                                                       |
| Lartey 2011       | Patients were censored if they discontinued the study (due to TB-IRIS, pregnancy, poor adherence, or withdrawal of consent), died, or were LTFU.                                                                                                                                                                                                                                                                                                                     |
| Manosuthi 2006    | No deaths or LTFU are reported during the first 24 weeks of cART. However, an “on-treatment” sensitivity analysis found similar results.                                                                                                                                                                                                                                                                                                                             |
| Manosuthi 2008    | Patients who were LTFU, developed HIV drug resistance, experienced adverse events, died, or transferred care were included in the “intent-to-treat” primary analysis and considered treatment failures. An “on-treatment” sensitivity analysis excluded these patients.                                                                                                                                                                                              |
| Manosuthi 2010    | Patients who discontinued cART for any reason were considered to be treatment failures. A “modified intent-to-treat” analysis included all patients in the analysis, but those who switched from stavudine were not considered to be treatment failures. Missing HIV RNA levels were assumed to be >50 copies/mL. Patients who had been on a drug holiday of longer than 4 weeks were considered LTFU and censored at date of first missing visit.                   |
| Mugusi 2012       | Patients missing follow-up laboratory results were excluded from analysis (n=13). Patients who died were censored.                                                                                                                                                                                                                                                                                                                                                   |
| Mussini 2008      | Methods for handling LTFU and mortality were not described.                                                                                                                                                                                                                                                                                                                                                                                                          |
| Odo 2012          | Patients included in analysis were required to be on cART for $\geq 1$ year and have $\geq 3$ follow-up CD4 counts.                                                                                                                                                                                                                                                                                                                                                  |
| Patel 2004        | No patients were LTFU or died by 9 months of cART.                                                                                                                                                                                                                                                                                                                                                                                                                   |
| Schomaker 2013    | Patients with <6 months of follow-up were excluded. Methods for handling LTFU and mortality beyond 6 months were not described.                                                                                                                                                                                                                                                                                                                                      |
| Shipton 2009      | The analysis was limited to patients with $\geq 1$ HIV RNA and CD4 count after cART initiation. Patients who died or were LTFU were censored.                                                                                                                                                                                                                                                                                                                        |
| Sumantri 2008     | Patients with incomplete or lost medical records were excluded. Methods for handling LTFU and mortality were not described.                                                                                                                                                                                                                                                                                                                                          |
| Tan 2010          | Methods for handling LTFU and mortality were not described.                                                                                                                                                                                                                                                                                                                                                                                                          |
| Wanchu 2010 (a,b) | Methods for handling LTFU and mortality were not described.                                                                                                                                                                                                                                                                                                                                                                                                          |

Abbreviations: LTFU, lost-to-follow-up; IRIS, immune reconstitution inflammatory syndrome.

**Supplemental Digital Content 4. Quantification of virologic response to combination antiretroviral therapy, stratified by TB treatment status, as reported by 17 studies**

| Study                       | TB treatment | VIROLOGIC SUPPRESSION |                          |                 |                        |                                | VIROLOGIC FAILURE  |                                         |                      |                        |                                   | OTHER                                                                                                                                       |
|-----------------------------|--------------|-----------------------|--------------------------|-----------------|------------------------|--------------------------------|--------------------|-----------------------------------------|----------------------|------------------------|-----------------------------------|---------------------------------------------------------------------------------------------------------------------------------------------|
|                             |              | Follow-up (months)    | Lower limit of detection | Suppressed, %   | Suppressed, n/N        | RR for suppression (95% CI)    | Follow-up (months) | Definition of virologic failure         | Virologic failure, % | Virologic failure, n/N | RR for virologic failure (95% CI) |                                                                                                                                             |
| Almeida[16]                 | Yes          | 4                     | 400                      | 82 <sup>a</sup> | 22/27                  | 1.33 (1.02, 1.74) <sup>a</sup> | NR                 | NR                                      | NR                   | NR                     | NR                                | OR for early virologic control (<400 at 4 months) vs. late virologic control (>400 at 4 months and <400 by 10 months):<br>11.0 (1.38, 87.9) |
|                             | No           |                       |                          | 61 <sup>a</sup> | 38/62                  |                                |                    |                                         | NR                   | NR                     |                                   |                                                                                                                                             |
| Bassett[44]                 | Yes          | 12                    | 50                       | 83 <sup>a</sup> | 285/343 <sup>a</sup>   | 0.98 (0.92, 1.04) <sup>a</sup> | NR                 | NR                                      | NR                   | NR                     | NR                                |                                                                                                                                             |
|                             | No           |                       |                          | 85              | 517/608 <sup>a</sup>   |                                |                    |                                         | NR                   | NR                     |                                   |                                                                                                                                             |
| Bastard[17]                 | Yes          | 48                    | 400                      | NR              | NR                     | 1.09 (0.73, 1.63)              | 48                 | >5000                                   | NR                   | NR                     | 0.94 (0.56, 1.98)                 |                                                                                                                                             |
|                             | No           |                       |                          | NR              | NR                     |                                |                    |                                         | NR                   | NR                     |                                   |                                                                                                                                             |
| Boulle (a)[18] <sup>b</sup> | Yes          | 6                     | 400                      | 84 <sup>a</sup> | 118/141 <sup>a</sup>   | 0.5 (0.3, 0.8) <sup>a</sup>    | 18                 | Failure to suppress <400 over 18 months | NR                   | NR                     | 2.0 (1.8, 2.4) <sup>a</sup>       |                                                                                                                                             |
|                             | No           |                       |                          | 92 <sup>a</sup> | 1033/1126 <sup>a</sup> |                                |                    |                                         | NR                   | NR                     |                                   |                                                                                                                                             |
|                             | Yes          | 12                    | 400                      | 80 <sup>a</sup> | 92/115 <sup>a</sup>    | 0.6 (0.4, 1.0) <sup>a</sup>    | 24                 | Time to first value ≥400                | NR                   | NR                     | 1.4 (1.0, 1.9)                    |                                                                                                                                             |
|                             | No           |                       |                          | 88 <sup>a</sup> | 688/784 <sup>a</sup>   |                                |                    |                                         | NR                   | NR                     |                                   |                                                                                                                                             |
|                             | Yes          | 18                    | 400                      | 80 <sup>a</sup> | 64/80 <sup>a</sup>     | 0.7 (0.4, 1.4) <sup>a</sup>    | 24                 | Time to 2 consecutive values ≥5000      | NR                   | NR                     | 2.2 (1.3, 3.7)                    |                                                                                                                                             |
| Boulle (b)[18] <sup>b</sup> | Yes          | 6                     | 400                      | 94 <sup>a</sup> | 663/708 <sup>a</sup>   | 0.9 (0.6, 1.4) <sup>a</sup>    | 18                 | Failure to suppress <400 over 18 months | NR                   | NR                     | 1.1 (0.8, 1.6)                    |                                                                                                                                             |
|                             | No           |                       |                          | 94 <sup>a</sup> | 574/609 <sup>a</sup>   |                                |                    |                                         | NR                   | NR                     |                                   |                                                                                                                                             |
|                             | Yes          | 12                    | 400                      | 92 <sup>a</sup> | 392/426 <sup>a</sup>   | 1.1 (0.7, 1.7) <sup>a</sup>    | 24                 | Time to first value ≥400                | NR                   | NR                     | 0.9 (0.7, 1.1)                    |                                                                                                                                             |
|                             | No           |                       |                          | 92 <sup>a</sup> | 399/434 <sup>a</sup>   |                                |                    |                                         | NR                   | NR                     |                                   |                                                                                                                                             |
|                             | Yes          | 18                    | 400                      | 89 <sup>a</sup> | 193/218 <sup>a</sup>   | 0.8 (0.5, 1.7) <sup>a</sup>    | 24                 | Time to 2 consecutive values ≥5000      | NR                   | NR                     | 1.1 (0.6, 2.0)                    |                                                                                                                                             |
| Boulle (a)[40] <sup>b</sup> | Yes          | NR                    | NR                       | NR              | NR                     | NR                             | 60                 | Time to 2 consecutive values ≥5000      | NR                   | NR                     | 1.3 (0.9, 1.9)                    |                                                                                                                                             |
|                             | No           |                       |                          | NR              | NR                     |                                |                    |                                         | NR                   | NR                     |                                   |                                                                                                                                             |
| Boulle (b)[40] <sup>b</sup> | Yes          | NR                    | NR                       | NR              | NR                     | NR                             | 60                 | Time to 2 consecutive values ≥5000      | NR                   | NR                     | 1.7 (1.1, 2.5) <sup>a,c</sup>     |                                                                                                                                             |
|                             | No           |                       |                          | NR              | NR                     |                                |                    |                                         | NR                   | NR                     |                                   |                                                                                                                                             |
| Breen[19]                   | Yes          | 6                     | 400                      | 87              | 71/82                  | 0.95 (0.85, 1.05) <sup>a</sup> | NR                 | NR                                      | NR                   | NR                     | NR                                |                                                                                                                                             |
|                             | No           |                       |                          | 91              | 75/82                  |                                |                    |                                         | NR                   | NR                     |                                   |                                                                                                                                             |
| Dronda[21]                  | Yes          | 6                     | 50                       | 59              | 44/75                  | 0.91 (0.75, 1.11) <sup>a</sup> | NR                 | NR                                      | NR                   | NR                     | NR                                |                                                                                                                                             |
|                             | No           |                       |                          | 64              | 899/1396               |                                |                    |                                         | NR                   | NR                     |                                   |                                                                                                                                             |
|                             | Yes          | 12                    | 50                       | 60              | 34/57                  | 0.90 (0.72, 1.12) <sup>a</sup> | NR                 | NR                                      | NR                   | NR                     | NR                                |                                                                                                                                             |

|               |     |    |     |                 |                          |                                |     |                                                                                            |    |        |                                |  |
|---------------|-----|----|-----|-----------------|--------------------------|--------------------------------|-----|--------------------------------------------------------------------------------------------|----|--------|--------------------------------|--|
|               | No  |    |     | 66              | 761/1147                 |                                |     |                                                                                            | NR | NR     |                                |  |
| Hung[23]      | Yes | 1  | 400 | 43              | 20/46                    | 0.93 (0.65, 1.34)              | 17  | >400 after undetectable, or never undetectable after 4 months                              | 38 | 13/34  | 1.49 (0.92, 2.41)              |  |
|               | No  |    |     | 47              | 107/230                  |                                |     |                                                                                            | 26 | 57/222 |                                |  |
| Lartey[25]    | Yes | 6  | 400 | 91              | 21/23                    | 0.97 (0.83, 1.13) <sup>a</sup> | NR  | NR                                                                                         | NR | NR     | NR                             |  |
|               | No  |    |     | 94              | 31/33                    |                                |     |                                                                                            | NR | NR     |                                |  |
|               | Yes | 11 | 400 | 80              | 16/20                    | 0.83 (0.66, 1.04) <sup>a</sup> | 11  | Failure to get <400 by week 24, or rebound to >400 at week 48 after suppressing at week 24 | NR | NR     | 2.04 (0.50, 8.37)              |  |
|               | No  |    |     | 96              | 27/28                    |                                |     |                                                                                            | NR | NR     |                                |  |
| Manosuthi[39] | Yes | 6  | 50  | 73              | 51/70                    | 1.11 (0.89, 1.38) <sup>a</sup> | NR  | NR                                                                                         | NR | NR     | NR                             |  |
|               | No  |    |     | 66              | 46/70                    |                                |     |                                                                                            | NR | NR     |                                |  |
| Manosuthi[26] | Yes | 33 | 50  | 61              | 43/70                    | 1.19 (0.61, 2.35)              | 33  | Rebound >1000 at 144 weeks after previously <50, or lack of achieving <50 by 24 weeks      | 10 | 7/70   | 1.17 (0.41, 3.30) <sup>a</sup> |  |
|               | No  |    |     | 57              | 40/70                    |                                |     |                                                                                            | 9  | 6/70   |                                |  |
| Manosuthi[27] | Yes | 48 | 50  | 53              | 37/70                    | 1.12 (0.58, 2.18)              | NR  | NR                                                                                         | NR | NR     | NR                             |  |
|               | No  |    |     | 50              | 35/70                    |                                |     |                                                                                            | NR | NR     |                                |  |
| Mussini[28]   | Yes | NR | NR  | NR              | NR                       | NR                             | 106 | Among those who initially suppressed, time until first value >500                          | NR | NR     | 1.73 (1.24, 2.42)              |  |
|               | No  |    |     | NR              | NR                       |                                |     |                                                                                            | NR | NR     |                                |  |
| Schomaker[43] | Yes | 12 | 400 | 81              | 851/1052 <sup>a</sup>    | 1.02 (0.99, 1.06) <sup>a</sup> | NR  | NR                                                                                         | NR | NR     | NR                             |  |
|               | No  |    |     | 79              | 11544/14594 <sup>a</sup> |                                |     |                                                                                            | NR | NR     |                                |  |
| Shipton[30]   | Yes | 3  | 400 | 90 <sup>a</sup> | 111/123 <sup>a</sup>     | 0.98 (0.91, 1.05) <sup>a</sup> | NR  | NR                                                                                         | NR | NR     | NR                             |  |
|               | No  |    |     | 92 <sup>a</sup> | 121/131 <sup>a</sup>     |                                |     |                                                                                            | NR | NR     |                                |  |
|               | Yes | 6  | 400 | 86 <sup>a</sup> | 44/51 <sup>a</sup>       | 0.92 (0.80, 1.05) <sup>a</sup> | NR  | NR                                                                                         | NR | NR     | NR                             |  |
|               | No  |    |     | 94 <sup>a</sup> | 33/35 <sup>a</sup>       |                                |     |                                                                                            | NR | NR     |                                |  |
|               | Yes | 9  | 400 | 91 <sup>a</sup> | 61/67 <sup>a</sup>       | 1.00 (0.90, 1.12) <sup>a</sup> | NR  | NR                                                                                         | NR | NR     | NR                             |  |
|               | No  |    |     | 91 <sup>a</sup> | 59/65 <sup>a</sup>       |                                |     |                                                                                            | NR | NR     |                                |  |
|               | Yes | 12 | 400 | 90 <sup>a</sup> | 47/52 <sup>a</sup>       | 1.08 (0.94, 1.25) <sup>a</sup> | NR  | NR                                                                                         | NR | NR     | NR                             |  |
|               | No  |    |     | 83 <sup>a</sup> | 50/60 <sup>a</sup>       |                                |     |                                                                                            | NR | NR     |                                |  |
| Sumantri[32]  | Yes | 6  | 400 | 62 <sup>a</sup> | 31/50 <sup>a</sup>       | 0.71 (0.54, 0.92) <sup>a</sup> | NR  | NR                                                                                         | NR | NR     | NR                             |  |
|               | No  |    |     | 88 <sup>a</sup> | 21/24 <sup>a</sup>       |                                |     |                                                                                            | NR | NR     |                                |  |
| Tan[38]       | Yes | 11 | 50  | 100             | 15/15                    | 1.00 (1.00, 1.00) <sup>a</sup> | NR  | NR                                                                                         | NR | NR     | NR                             |  |
|               | No  |    |     | 100             | 27/27                    |                                |     |                                                                                            | NR | NR     |                                |  |

Median HIV RNA at 3 months: 233 copies/mL <50 copies/mL

Abbreviations: CI, confidence interval; NR, not reported; OR, odds ratio; RR, relative risk; TB, tuberculosis.

<sup>a</sup> Calculated or estimated from reported data, but not directly reported by the study

<sup>b</sup> (a) Nevirapine-based cART; (b) Efavirenz-based cART

<sup>a</sup> CI estimated from reported data, using incidence rate ratios to approximate the adjusted hazard ratios

**Supplemental Digital Content 5. Meta-regression results for the effect of TB treatment on virologic suppression after combination antiretroviral therapy initiation**

| Category                                  | Number of estimates | Tau-squared | Homogeneity p-value | RR <sub>RE</sub> (95% CI) | Ratio of RRs (95% CI) |
|-------------------------------------------|---------------------|-------------|---------------------|---------------------------|-----------------------|
| All                                       | 13                  | 0.003       | 0.060               | 0.97 (0.92, 1.03)         |                       |
| Lower limit of detection of 400 copies/mL | 10                  | 0.006       | 0.027               | 0.97 (0.89, 1.05)         | Reference             |
| Lower limit of detection of 50 copies/mL  | 3                   | 0.000       | 0.656               | 0.98 (0.92, 1.03)         | 1.00 (0.85, 1.17)     |
| Mixed cART regimens                       | 9                   | 0.003       | 0.037               | 0.97 (0.92, 1.03)         | Reference             |
| EFV-based cART regimens                   | 2                   | 0.000       | 0.605               | 0.99 (0.85, 1.14)         | 1.01 (0.80, 1.28)     |
| NVP-based cART regimens                   | 2                   | 0.118       | 0.130               | 0.83 (0.44, 1.55)         | 0.80 (0.46, 1.42)     |

Abbreviations: cART, combination antiretroviral therapy; CI, confidence interval; EFV, efavirenz; NVP, nevirapine; RR, relative risk; RR<sub>RE</sub>, random-effects summary relative risk; TB, tuberculosis

**Supplemental Digital Content 6. Forest plot of cART regimen-specific relative risks of virologic suppression**

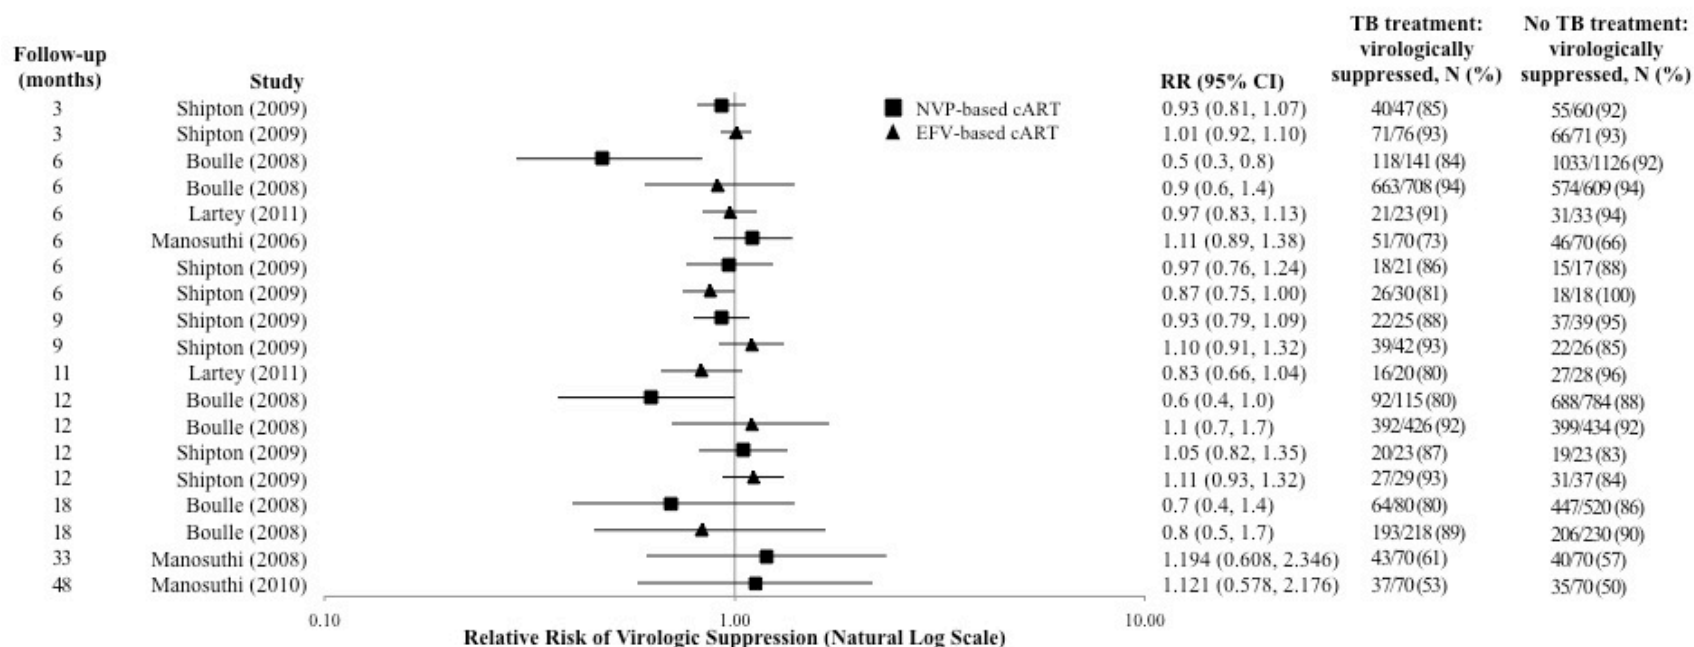

cART regimen-specific relative risks of virologic suppression in those receiving vs. not receiving tuberculosis treatment at cART initiation, as reported by or calculated from 6 studies. Estimates were abstracted according to the precision and stratification used by the original authors. Estimates calculated using available data are reported to 2 decimal places. Abbreviations: cART, combination antiretroviral therapy; CI, confidence interval; EFV, efavirenz; NVP, nevirapine; RR, relative risk.

**Supplemental Digital Content 7. Funnel plot of overall relative risk of virologic suppression**

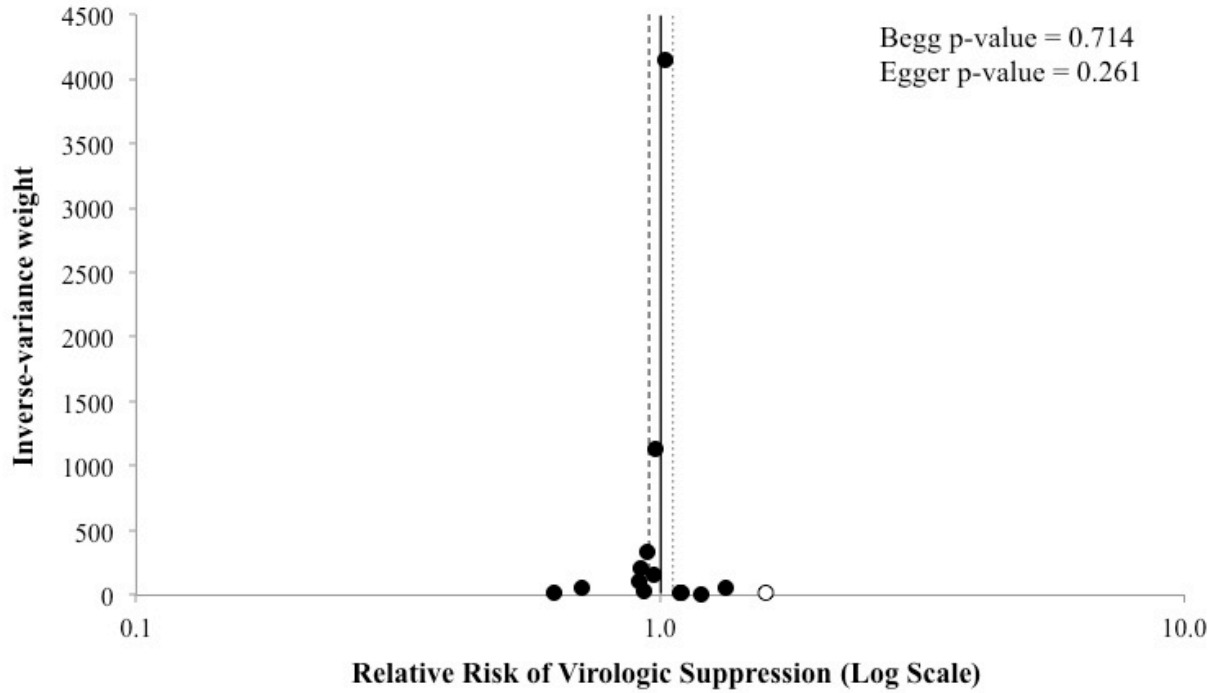

Funnel plot of virologic suppression relative risks and inverse-variance weights included in the 1-48 month summary estimate. Black circles are reported results; the white circle is the imputed estimate from the trim-and-fill method. The solid line is the null value of 1. The dashed line represents the random effects summary relative risk. The dotted line represents the random effects summary relative risk with the imputed study.



**Supplemental Digital Content 8. Quantification of CD4 count response to combination antiretroviral therapy, stratified by TB treatment status, as reported by 21 studies**

|                               |                    |              | CHANGE IN CD4 COUNT             |                                  |                                 | IMMUNOLOGIC SUCCESS               |            |              |                                | OTHER IMMUNOLOGIC RESPONSE MEASURES                                                                                                                 |                                         |
|-------------------------------|--------------------|--------------|---------------------------------|----------------------------------|---------------------------------|-----------------------------------|------------|--------------|--------------------------------|-----------------------------------------------------------------------------------------------------------------------------------------------------|-----------------------------------------|
| Study                         | Follow-up (months) | TB treatment | Baseline CD4 count <sup>a</sup> | Change in CD4 count <sup>a</sup> | Absolute CD4 count <sup>a</sup> | Definition of immunologic success | Success, % | Success, n/N | RR for success (95% CI)        | Measure 1                                                                                                                                           | Measure 2                               |
| Auld[41]                      | 36                 | Yes          | NR                              | NR                               | NR                              | NR                                | NR         | NR           | NR                             | aHR for immunologic failure [CD4 count decline from baseline, CD4 <100, or 50% decline from peak CD4 count after ≥6 months of cART]: 1.0 (0.7, 1.3) | Rate of immunologic failure: 13.9/100PY |
|                               |                    | No           | NR                              | NR                               | NR                              |                                   | NR         | NR           |                                |                                                                                                                                                     |                                         |
| Bassett[44]                   | 12                 | Yes          | 71 <sup>b</sup>                 | 123.5 <sup>b</sup>               | NR                              | NR                                | NR         | NR           | NR                             |                                                                                                                                                     | 14.0/100PY                              |
|                               |                    | No           | 104                             | 109                              | NR                              |                                   | NR         | NR           |                                |                                                                                                                                                     |                                         |
| Boulle (a)[18] <sup>c</sup>   | 18                 | Yes          | 80                              | NR                               | NR                              | NR                                | NR         | NR           | NR                             | Increase in CD4 count from baseline: 29 more cells than those not on TB treatment                                                                   |                                         |
|                               |                    | No           | 116                             | NR                               | NR                              |                                   | NR         | NR           |                                |                                                                                                                                                     |                                         |
| Boulle (b)[18] <sup>c</sup>   | 18                 | Yes          | 61                              | NR                               | NR                              | NR                                | NR         | NR           | NR                             | Increase in CD4 count from baseline: 29 more cells than those not on TB treatment                                                                   |                                         |
|                               |                    | No           | 93                              | NR                               | NR                              |                                   | NR         | NR           |                                |                                                                                                                                                     |                                         |
| Boulle[40]                    | 6                  | Yes          | NR                              | NR                               | NR                              | NR                                | NR         | NR           | NR                             | Increase in CD4 count from baseline <sup>d</sup> : 4.7 more cells than those not on TB treatment                                                    |                                         |
|                               |                    | No           | NR                              | NR                               | NR                              |                                   | NR         | NR           |                                |                                                                                                                                                     |                                         |
| Breen[19]                     | 6                  | Yes          | NR                              | 97                               | NR                              | NR                                | NR         | NR           | NR                             |                                                                                                                                                     |                                         |
|                               |                    | No           | NR                              | 89                               | NR                              |                                   | NR         | NR           |                                |                                                                                                                                                     |                                         |
| Dronda[21]                    | 6                  | Yes          | 80                              | NR                               | NR                              | Increase of ≥50                   | 60         | 47/78        | 0.87 (0.72, 1.04) <sup>b</sup> |                                                                                                                                                     |                                         |
|                               |                    | No           | 226                             | NR                               | NR                              |                                   | 69         | 1000/1442    |                                |                                                                                                                                                     |                                         |
|                               | 12                 | Yes          | 80                              | 188                              | NR                              | Increase of ≥100                  | 56         | 33/59        | 0.91 (0.72, 1.14) <sup>b</sup> |                                                                                                                                                     |                                         |
|                               |                    | No           | 226                             | 182                              | NR                              |                                   | 62         | 728/1181     |                                |                                                                                                                                                     |                                         |
| Hardwick (a)[22] <sup>e</sup> | 3                  | Yes          | 83                              | 109 <sup>b</sup>                 | 192 <sup>b</sup>                | NR                                | NR         | NR           | NR                             |                                                                                                                                                     |                                         |
|                               |                    | No           | 106                             | 81 <sup>b</sup>                  | 187 <sup>b</sup>                |                                   | NR         | NR           |                                |                                                                                                                                                     |                                         |
|                               | 6                  | Yes          | 83                              | 118 <sup>b</sup>                 | 201 <sup>b</sup>                | NR                                | NR         | NR           | NR                             |                                                                                                                                                     |                                         |
|                               |                    | No           | 106                             | 91 <sup>b</sup>                  | 197 <sup>b</sup>                |                                   | NR         | NR           |                                |                                                                                                                                                     |                                         |
|                               | 9                  | Yes          | 83                              | 122 <sup>b</sup>                 | 205 <sup>b</sup>                | NR                                | NR         | NR           | NR                             |                                                                                                                                                     |                                         |

|                               |    |     |     |                  |                  |                                      |    |         |                                |  |  |  |
|-------------------------------|----|-----|-----|------------------|------------------|--------------------------------------|----|---------|--------------------------------|--|--|--|
|                               |    | No  | 106 | 116 <sup>b</sup> | 222 <sup>b</sup> |                                      |    |         |                                |  |  |  |
|                               | 11 | Yes | 83  | 128 <sup>b</sup> | 211 <sup>b</sup> |                                      | NR | NR      |                                |  |  |  |
|                               |    | No  | 106 | 104 <sup>b</sup> | 210 <sup>b</sup> |                                      |    |         |                                |  |  |  |
| Hardwick (b)[22] <sup>e</sup> | 3  | Yes | 95  | 112 <sup>b</sup> | 207 <sup>b</sup> |                                      | NR | NR      |                                |  |  |  |
|                               |    | No  | 100 | 115 <sup>b</sup> | 215 <sup>b</sup> |                                      |    |         |                                |  |  |  |
|                               | 9  | Yes | 95  | 181 <sup>b</sup> | 276 <sup>b</sup> |                                      | NR | NR      |                                |  |  |  |
|                               |    | No  | 100 | 154 <sup>b</sup> | 254 <sup>b</sup> |                                      |    |         |                                |  |  |  |
|                               | 11 | Yes | 95  | 155 <sup>b</sup> | 250 <sup>b</sup> |                                      | NR | NR      |                                |  |  |  |
|                               |    | No  | 100 | 165 <sup>b</sup> | 265 <sup>b</sup> |                                      |    |         |                                |  |  |  |
| Hermans[35]                   | 22 | Yes | 54  | NR               | NR               |                                      | NR | NR      |                                |  |  |  |
|                               |    | No  | 111 | NR               | NR               |                                      |    |         |                                |  |  |  |
| Hung[23]                      | 1  | Yes | 38  | 71               | NR               |                                      | NR | NR      |                                |  |  |  |
|                               |    | No  | 80  | 64               | NR               |                                      |    |         |                                |  |  |  |
| Julg[24]                      | 12 | Yes | NR  | NR               | NR               | Absolute CD4 count >200 <sup>d</sup> | 64 | 116/182 | 1.05 (0.90, 1.21) <sup>b</sup> |  |  |  |
|                               |    | No  | NR  | NR               | NR               |                                      | 61 | 145/238 |                                |  |  |  |
|                               | 30 | Yes | NR  | NR               | NR               | Absolute CD4 count >500              | 20 | 37/183  | 1.33 (0.87, 2.01) <sup>b</sup> |  |  |  |
|                               |    | No  | NR  | NR               | NR               |                                      | 15 | 36/236  |                                |  |  |  |
| Lartey[25]                    | 6  | Yes | 76  | 172              | NR               |                                      | NR | NR      |                                |  |  |  |
|                               |    | No  | 88  | 112              | NR               |                                      |    |         |                                |  |  |  |
|                               | 11 | Yes | 76  | 234              | NR               |                                      | NR | NR      |                                |  |  |  |
|                               |    | No  | 88  | 205              | NR               |                                      |    |         |                                |  |  |  |
| Manosuthi[26]                 | 3  | Yes | 37  | NR               | 200 <sup>b</sup> |                                      | NR | NR      |                                |  |  |  |
|                               |    | No  | 29  | NR               | 151 <sup>b</sup> |                                      |    |         |                                |  |  |  |
|                               | 6  | Yes | 37  | NR               | 227 <sup>b</sup> |                                      | NR | NR      |                                |  |  |  |
|                               |    | No  | 29  | NR               | 205 <sup>b</sup> |                                      |    |         |                                |  |  |  |
|                               | 9  | Yes | 37  | NR               | 265 <sup>b</sup> |                                      | NR | NR      |                                |  |  |  |
|                               |    | No  | 29  | NR               | 243 <sup>b</sup> |                                      |    |         |                                |  |  |  |
|                               | 11 | Yes | 37  | NR               | 296 <sup>b</sup> |                                      | NR | NR      |                                |  |  |  |
|                               |    | No  | 29  | NR               | 261 <sup>b</sup> |                                      |    |         |                                |  |  |  |
|                               | 14 | Yes | 37  | NR               | 308 <sup>b</sup> |                                      | NR | NR      |                                |  |  |  |
|                               |    | No  | 29  | NR               | 300 <sup>b</sup> |                                      |    |         |                                |  |  |  |
|                               | 17 | Yes | 37  | NR               | 346 <sup>b</sup> |                                      | NR | NR      |                                |  |  |  |
|                               |    | No  | 29  | NR               | 341 <sup>b</sup> |                                      |    |         |                                |  |  |  |

Increase in CD4 count from baseline: 3.8 more cells than those not on TB treatment

OR for absolute CD4 count <500: 0.58 (0.33, 1.03)

Increase from baseline: 9.55 cells/month  
8.66 cells/month

|               |            |     |     |      |                  |    |    |    |    |                                                                                    |                                                                                    |    |    |    |    |    |
|---------------|------------|-----|-----|------|------------------|----|----|----|----|------------------------------------------------------------------------------------|------------------------------------------------------------------------------------|----|----|----|----|----|
| Manosuthi[27] | 19         | Yes | 37  | NR   | 355 <sup>b</sup> | NR | NR | NR | NR |                                                                                    |                                                                                    |    |    |    |    |    |
|               |            | No  | 29  | NR   | 356 <sup>b</sup> |    |    |    |    |                                                                                    |                                                                                    |    |    |    |    |    |
|               | 22         | Yes | 37  | NR   | 404 <sup>b</sup> |    |    |    |    |                                                                                    |                                                                                    | NR | NR | NR | NR |    |
|               |            | No  | 29  | NR   | 370 <sup>b</sup> |    |    |    |    |                                                                                    |                                                                                    |    |    |    |    |    |
|               | 28         | Yes | 37  | NR   | 411 <sup>b</sup> |    |    |    |    |                                                                                    |                                                                                    | NR | NR | NR | NR |    |
|               |            | No  | 29  | NR   | 418 <sup>b</sup> |    |    |    |    |                                                                                    |                                                                                    |    |    |    |    |    |
|               | 33         | Yes | 37  | NR   | 430 <sup>b</sup> |    |    |    |    |                                                                                    |                                                                                    | NR | NR | NR | NR |    |
|               |            | No  | 29  | NR   | 441 <sup>b</sup> |    |    |    |    |                                                                                    |                                                                                    |    |    |    |    |    |
|               | 48         | Yes | 37  | NR   | 352              |    |    |    |    |                                                                                    |                                                                                    | NR | NR | NR | NR |    |
|               |            | No  | 29  | NR   | 425              |    |    |    |    |                                                                                    |                                                                                    |    |    |    |    |    |
|               | Mugusi[42] | 3   | Yes | 94.5 | 109              |    |    |    |    |                                                                                    |                                                                                    | NR | NR | NR | NR | NR |
|               |            | No  | 90  | 113  | NR               |    |    |    |    |                                                                                    |                                                                                    |    |    |    |    |    |
| Odo[37]       | 53         | Yes | 126 | NR   | NR               | NR | NR | NR | NR | Median on treatment peak CD4:<br>517 cells/ $\mu$ L                                | Median change between<br>baseline and on treatment<br>peak CD4: 381 cells/ $\mu$ L |    |    |    |    |    |
|               | No         | 161 | NR  | NR   |                  |    |    |    |    |                                                                                    |                                                                                    |    |    |    |    |    |
| Patel[29]     | 3          | Yes | 84  | 141  | 225              | NR | NR | NR | NR | 531                                                                                | 363                                                                                |    |    |    |    |    |
|               |            | No  | 118 | 126  | 244              |    |    |    |    |                                                                                    |                                                                                    |    |    |    |    |    |
|               | 6          | Yes | 84  | 167  | 251              |    |    |    |    |                                                                                    |                                                                                    |    |    |    |    |    |
|               |            | No  | 118 | 177  | 294              |    |    |    |    |                                                                                    |                                                                                    |    |    |    |    |    |
| Schomaker[43] | 9          | Yes | 84  | 190  | 275              | NR | NR | NR | NR | CD4 recovery slope:<br>-3.25 more cells/6 months than<br>those not on TB treatment |                                                                                    |    |    |    |    |    |
|               |            | No  | 118 | 176  | 295              |    |    |    |    |                                                                                    |                                                                                    |    |    |    |    |    |
|               | 6          | Yes | 45  | NR   | NR               |    |    |    |    |                                                                                    |                                                                                    |    |    |    |    |    |
|               |            | No  | 102 | NR   | NR               |    |    |    |    |                                                                                    |                                                                                    |    |    |    |    |    |
|               | 48         | Yes | 45  | NR   | NR               |    |    |    |    |                                                                                    |                                                                                    |    |    |    |    |    |
|               |            | No  | 102 | NR   | NR               |    |    |    |    |                                                                                    |                                                                                    |    |    |    |    |    |
| Shipton[30]   | 3          | Yes | 72  | NR   | 210 <sup>b</sup> | NR | NR | NR | NR | CD4 recovery slope:<br>4.94 more cells/6 months than<br>those not on TB treatment  |                                                                                    |    |    |    |    |    |
|               |            | No  | 85  | NR   | 220 <sup>b</sup> |    |    |    |    |                                                                                    |                                                                                    |    |    |    |    |    |
|               | 6          | Yes | 72  | NR   | 230 <sup>b</sup> |    |    |    |    |                                                                                    |                                                                                    |    |    |    |    |    |
|               |            | No  | 85  | NR   | 270 <sup>b</sup> |    |    |    |    |                                                                                    |                                                                                    |    |    |    |    |    |
|               | 9          | Yes | 72  | NR   | 253 <sup>b</sup> |    |    |    |    |                                                                                    |                                                                                    |    |    |    |    |    |
|               |            | No  | 85  | NR   | 271 <sup>b</sup> |    |    |    |    |                                                                                    |                                                                                    |    |    |    |    |    |

|                             |    |     |     |                  |                  |    |    |    |    |
|-----------------------------|----|-----|-----|------------------|------------------|----|----|----|----|
|                             | 12 | Yes | 72  | NR               | 275 <sup>b</sup> | NR | NR | NR | NR |
|                             |    | No  | 85  | NR               | 270 <sup>b</sup> |    | NR | NR |    |
| Sumantri[32]                | 6  | Yes | 126 | 129              | 257              | NR | NR | NR | NR |
|                             |    | No  | 241 | 138              | 394              |    | NR | NR |    |
| Tan[38]                     | 3  | Yes | 22  | NR               | 173              | NR | NR | NR | NR |
|                             |    | No  | 34  | NR               | 141              |    | NR | NR |    |
|                             | 11 | Yes | 22  | NR               | 204              | NR | NR | NR | NR |
|                             |    | No  | 34  | NR               | 218              |    | NR | NR |    |
| Wanchu (a)[33] <sup>f</sup> | 6  | Yes | 150 | 195 <sup>b</sup> | 345              | NR | NR | NR | NR |
|                             |    | No  | 159 | 158 <sup>b</sup> | 317              |    | NR | NR |    |
| Wanchu (b)[33] <sup>f</sup> | 6  | Yes | 49  | 200 <sup>b</sup> | 249              | NR | NR | NR | NR |
|                             |    | No  | 50  | 155 <sup>b</sup> | 205              |    | NR | NR |    |

Abbreviations: aHR, adjusted hazard ratio; cART, combination antiretroviral therapy; CI, confidence interval; NR, not reported; OR, odds ratio; RR, relative risk; TB, tuberculosis.

<sup>a</sup> CD4 count was measured in cells/ $\mu$ L. If the median was not available, the mean is reported.

<sup>b</sup> Calculated or estimated from reported data, but not directly reported by the study

<sup>c</sup> (a) Nevirapine-based cART; (b) Efavirenz-based cART

<sup>d</sup> CD4 count analysis limited to virologically-suppressed patients

<sup>e</sup> (a) a cohort from Ethiopia; (b) a cohort from Tanzania

<sup>f</sup> (a) patients with baseline CD4 counts of 100-200 cells/ $\mu$ L; (b) patients with baseline CD4 counts <100 cells/ $\mu$ L
